# Supplementary material for: Analysis of Relationships between Metabolic Changes and Selected Nutrient Intake in Women Environmentally Exposed to Arsenic
Source: MDPI journal article supplement (doi:10.3390/metabo14010075), 2024-01-22
Supplement: s1 [file s1]

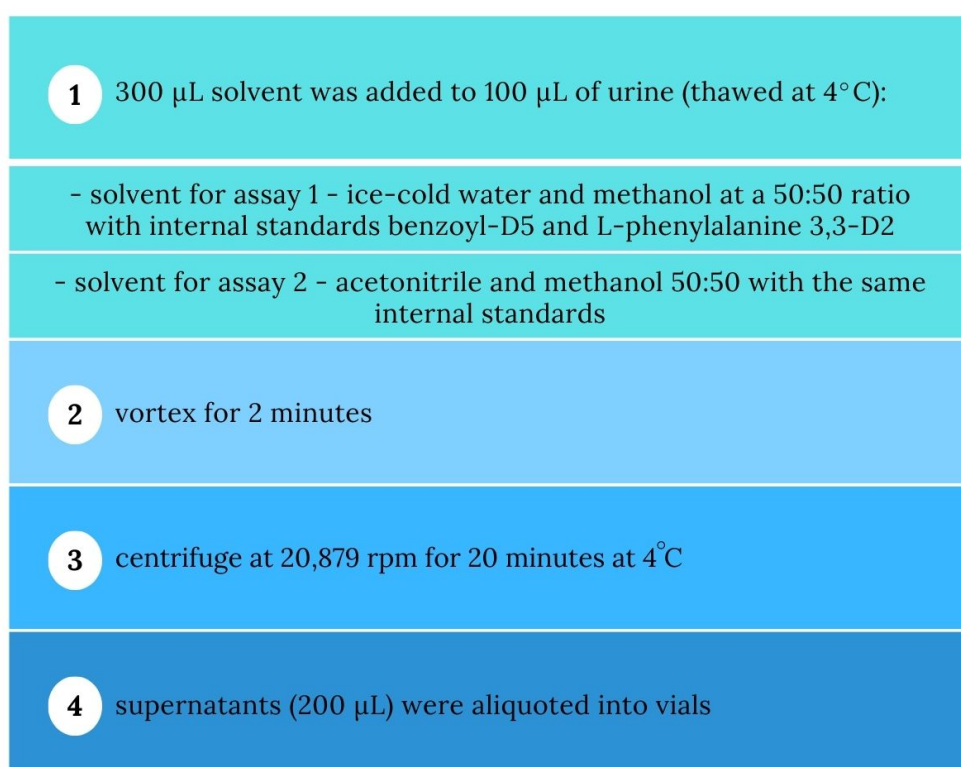

Figure S1. Flow chart of urine sample preparation for untargeted metabolomics.

Table S1. Reagents used for the metabolomics analysis.

| REAGENT                                              | SOURCE                                     | IDENTIFIER                                              |
|------------------------------------------------------|--------------------------------------------|---------------------------------------------------------|
| LC-MS-grade methanol                                 | Avantor Performance Materials Poland. S.A. | CAS: 67-56-1                                            |
| LC-MS-grade acetonitrile                             | Avantor Performance Materials Poland. S.A. | CAS: 75-05-8                                            |
| Formic acid 98-100%                                  | CHEM-LAB NV                                | CAS: 64-18-6                                            |
| Ammonium formate > 99.995% trace metals basis        | Sigma Aldrich                              | CAS: 540-69-2                                           |
| Glycine, N-Benzyol (Hippuric acid) (Benzyol-D5, 98%) | Cambridge Isotope Laboratories, Inc.       | CAS: 53518-98-2                                         |
| L-phenylalanine (3,3-D2 98%)                         | Cambridge Isotope Laboratories, Inc.       | CAS: 221346-31-2                                        |
| Sodium formate                                       | Waters                                     | prepared according to the manufacturer's specifications |
| Leucine encephalin lock mass solution                | Waters                                     | prepared according to the manufacturer's specifications |
| Ultra-high-purity water                              | R5 UV Hydrolab system (Wislina, Poland)    | -                                                       |

Table S2. Dietary intake of selected nutrients involved in iAs metabolism regarding the EAR norm.

| Dietary Intake                   | Both Groups      |                             | WL                |                             | WH               |                             | <i>p</i> - Value ** | EAR                          |
|----------------------------------|------------------|-----------------------------|-------------------|-----------------------------|------------------|-----------------------------|---------------------|------------------------------|
|                                  | <i>n</i> = 146   |                             | <i>n</i> = 73     |                             | <i>n</i> = 73    |                             |                     |                              |
|                                  | Mean ± SD        | Median<br>(Minimum-Maximum) | Mean ± SD         | Median<br>(Minimum-Maximum) | Mean ± SD        | Median<br>(Minimum-Maximum) |                     |                              |
| Methionine (mg/day)              | 1495.25 ± 464.14 | 1459.32 (670.33-3832.17)    | 1441.06 ± 396.79* | 1384.17 (670.33-2493.09)    | 1549.43 ± 520.05 | 1525.82 (714.21-3832.17)    | 0.2265              | —                            |
| Vitamin B <sub>2</sub> (mg/day)  | 1.33 ± 0.37      | 1.29 (0.68-2.64)            | 1.28 ± 0.36       | 1.23 (0.68-2.64)            | 1.39 ± 0.38      | 1.32 (0.77-2.36)            | 0.0872              | 0.9                          |
| Vitamin B <sub>6</sub> (mg/day)  | 1.57 ± 0.50      | 1.57 (0.46-3.46)            | 1.43 ± 0.45*      | 1.38 (0.46-2.55)            | 1.70 ± 0.51      | 1.63 (0.77-3.46)            | 0.0018              | 1.1 (19-50 y)<br>1.3 (>50 y) |
| Vitamin B <sub>12</sub> (µg/day) | 2.32 ± 1.41      | 2.05 (0.57-13.39)           | 2.09 ± 0.81       | 2.00 (0.57-4.92)            | 2.54 ± 1.80      | 2.07 (0.57-13.39)           | 0.3221              | 2.0                          |
| Folate (µg/day)                  | 260.46 ± 92.46   | 242.46 (78.14-682.02)       | 250.70 ± 93.97    | 232.37 (104.70-682.02)      | 270.22 ± 90.51   | 250.49 (78.14-618.13)       | 0.0809              | 320.0                        |
| Zinc (mg/day)                    | 8.19 ± 2.03      | 8.10 (4.57-13.22)           | 8.05 ± 2.08*      | 7.89 (4.57-13.22)           | 8.33 ± 1.98*     | 8.29 (4.65-12.66)           | 0.4069              | 6.8                          |

Abbreviations: \* — parametric distribution data (used Shapiro-Wilk test  $p \leq 0.05$ ); \*\* — the Student's *t*-test (for parametric distribution) and Mann-Whitney U test (for nonparametric distribution) were used to examine differences between WL and WH; EAR – estimated average requirement for Polish population; WL—the group of women with lower total urinary arsenic; WH—the group of women with higher total urinary arsenic.

Table S3. Putatively annotated metabolites.

| Number | Column/ESI mode | m/z      | r.t  | Calculated molecular weight (Da) | Delta (ppm)‡ | Monoisotopic molecular weight (Da) | Adduct             | Annotated compounds name (ID in HMDB)                                        | Fit (%) | Subpathway                                                                                                                                                                                                                                      | Chemical Taxonomy - Class        | p-Value | Test                     | WL vs. WH                         |
|--------|-----------------|----------|------|----------------------------------|--------------|------------------------------------|--------------------|------------------------------------------------------------------------------|---------|-------------------------------------------------------------------------------------------------------------------------------------------------------------------------------------------------------------------------------------------------|----------------------------------|---------|--------------------------|-----------------------------------|
| 1      | BEH Amide (+)   | 197.0809 | 4.61 | 196.0736                         | -0.3         | 196.0736                           | M+H                | Dihydroferulic acid (HMDB0062121)                                            | 0.94    | Food                                                                                                                                                                                                                                            | Phenylpropanoic acids            | 0.0000  | Mann-Whitney U test      | in the WH higher signal intensity |
| 2      | BEH Amide (+)   | 287.1602 | 5.43 | 254.1267                         | -0.2         | 254.1267                           | M+CH3OH+H          | Pyrraline (HMDB003143)                                                       | 0.95    | Food                                                                                                                                                                                                                                            | Carboxylic acids and derivatives | 0.0000  | Mann-Whitney U test      | in the WH higher signal intensity |
| 3      | BEH Amide (+)   | 291.1300 | 8.27 | 290.1227                         | -0.3         | 290.1226                           | M+H                | Argininosuccinic acid (HMDB0000052)                                          | 0.98    | Alanine, aspartate and glutamate metabolism; Arginine biosynthesis                                                                                                                                                                              | Carboxylic acids and derivatives | 0.0000  | Mann-Whitney U test      | in the WH higher signal intensity |
| 4      | BEH Amide (+)   | 138.0553 | 4.35 | 137.0480                         | -2.5         | 137.0477                           | M+H                | Trigonelline (HMDB000875)                                                    | 0.84    | Food                                                                                                                                                                                                                                            | Not Available                    | 0.0000  | Mann-Whitney U test      | in the WH higher signal intensity |
| 5      | BEH Amide (+)   | 179.0052 | 5.56 | 177.9975                         | -2.4         | 177.9975                           | M+H                | Arsenobetaine (HMDB003206)                                                   | 0.88    | Food                                                                                                                                                                                                                                            | Organometalloid compounds        | 0.0000  | Mann-Whitney U test      | in the WH higher signal intensity |
| 6      | BEH Amide (+)   | 203.0817 | 5.73 | 220.0844                         | 1.8          | 220.0848                           | M+H+H2O            | 5-Hydroxy-L-tryptophan (HMDB000472)                                          | 0.86    | Tryptophan metabolism                                                                                                                                                                                                                           | Indoles and derivatives          | 0.0000  | Mann-Whitney U test      | in the WH higher signal intensity |
| 7      | BEH Amide (+)   | 278.1236 | 7.23 | 278.1009                         | -2.6         | 278.1002                           | M+NH4+H2O          | Isovalerylglucuronide (HMDB002091)                                           | 0.95    | Starch and Sucrose Metabolism                                                                                                                                                                                                                   | Organooxygen compounds           | 0.0000  | Mann-Whitney U test      | in the WH higher signal intensity |
| 8      | BEH Amide (-)   | 147.0659 | 3.72 | 148.0732                         | 2.4          | 148.0736                           | M-H                | Mevalonic acid (HMDB0000227)                                                 | 0.88    | Terpenoid backbone biosynthesis                                                                                                                                                                                                                 | Fatty Acyls                      | 0.0000  | Mann-Whitney U test      | in the WH higher signal intensity |
| 9      | BEH Amide (-)   | 212.0116 | 2.05 | 175.0630                         | 1.9          | 175.0633                           | M+K-2H             | Indoleacetic acid (HMDB0000197)                                              | 0.88    | Food                                                                                                                                                                                                                                            | Indoles and derivatives          | 0.0000  | Mann-Whitney U test      | in the WH higher signal intensity |
| 10     | BEH Amide (-)   | 217.1440 | 0.97 | 172.1458                         | 3.1          | 172.1463                           | M+FA-H             | Capric acid (HMDB0000511)                                                    | 0.92    | Food                                                                                                                                                                                                                                            | Fatty Acyls                      | 0.0000  | Mann-Whitney U test      | in the WH higher signal intensity |
| 11     | BEH Amide (-)   | 267.0732 | 2.59 | 268.0805                         | 1.0          | 268.0808                           | M-H                | Inosine (HMDB0000195)                                                        | 0.99    | Purine metabolism                                                                                                                                                                                                                               | Purine nucleosides               | 0.0137  | Mann-Whitney U test      | in the WH lower signal intensity  |
| 12     | HSST3 (+)       | 287.2372 | 6.68 | 304.2399                         | 1.1          | 304.2402                           | M+H+H2O            | Arachidonic acid (HMDB0001043)                                               | 0.99    | Food                                                                                                                                                                                                                                            | Fatty Acyls                      | 0.0000  | Mann-Whitney U test      | in the WH higher signal intensity |
| 13     | HSST3 (+)       | 341.1743 | 6.28 | 376.1870                         | 4.2          | 376.1886                           | M+H+H2O            | 18-Oxocortisol (HMDB0000332)                                                 | 1.00    | Steroidogenic pathway                                                                                                                                                                                                                           | Steroids and steroid derivatives | 0.0000  | Mann-Whitney U test      | in the WH higher signal intensity |
| 14     | HSST3 (+)       | 492.2192 | 6.78 | 459.1857                         | 2.0          | 459.1866                           | M+CH3OH+H          | 5-Methyltetrahydrofolic acid (HMDB0001396)                                   | 0.97    | Food                                                                                                                                                                                                                                            | Pteridines and derivatives       | 0.0000  | Mann-Whitney U test      | in the WH higher signal intensity |
| 15     | HSST3 (+)       | 139.0030 | 2.07 | 174.0157                         | 4.2          | 174.0164                           | M+H-2H2O           | Dehydroascorbic acid (HMDB0001264)                                           | 0.94    | Food                                                                                                                                                                                                                                            | Lactones                         | 0.0000  | Mann-Whitney U test      | in the WH higher signal intensity |
| 16     | HSST3 (+)       | 179.0052 | 0.92 | 177.9979                         | -2.4         | 177.9975                           | M+H                | Arsenobetaine (HMDB0033206)                                                  | 0.88    | Food                                                                                                                                                                                                                                            | Organometalloid compounds        | 0.0000  | Student's <i>t</i> -test | in the WH higher signal intensity |
| 17     | HSST3 (+)       | 318.1658 | 3.73 | 276.1319                         | 0.9          | 276.1321                           | M+ACN+H            | Saccharopine (HMDB0000279)                                                   | 0.94    | Food                                                                                                                                                                                                                                            | Carboxylic acids and derivatives | 0.0000  | Mann-Whitney U test      | in the WH higher signal intensity |
| 18     | HSST3 (+)       | 370.0956 | 5.43 | 352.0618                         | -0.3         | 352.0617                           | M+NH4              | 3'-O-Methyl(-)-epicatechin-5-O-sulphate (HMDB0029176)                        | 0.98    | Food                                                                                                                                                                                                                                            | Flavonoids                       | 0.0000  | Mann-Whitney U test      | in the WH higher signal intensity |
| 19     | HSST3 (+)       | 198.0376 | 1.09 | 175.0484                         | -1.8         | 175.0481                           | M+Na               | N-Acetyl-L-aspartic acid (HMDB0000812)                                       | 0.82    | Alanine, aspartate and glutamate metabolism                                                                                                                                                                                                     | Carboxylic acids and derivatives | 0.0000  | Mann-Whitney U test      | in the WH higher signal intensity |
| 20     | HSST3 (+)       | 335.2576 | 6.82 | 334.2503                         | 1.4          | 334.2508                           | [M+H] <sup>+</sup> | Tetrahydrodeoxycorticosterone (HMDB0000879)                                  | 0.99    | Steroid hormone biosynthesis                                                                                                                                                                                                                    | Steroids and steroid derivatives | 0.0000  | Mann-Whitney U test      | in the WH higher signal intensity |
| 21     | HSST3 (+)       | 388.2690 | 6.69 | 370.2352                         | 1.0          | 370.2355                           | M+NH4              | Thromboxane B2 (HMDB0003252)                                                 | 1.00    | Arachidonic acid metabolism                                                                                                                                                                                                                     | Fatty Acyls                      | 0.0000  | Student's <i>t</i> -test | in the WH higher signal intensity |
| 22     | HSST3 (+)       | 133.0762 | 2.88 | 150.0789                         | 2.8          | 150.0793                           | M+H+H2O            | 6-Methylnicotinamide (HMDB00013704)                                          | 0.81    | Food                                                                                                                                                                                                                                            | Pyridines and derivatives        | 0.0000  | Mann-Whitney U test      | in the WH higher signal intensity |
| 23     | HSST3 (+)       | 379.1388 | 6.03 | 378.1315                         | -0.1         | 378.1315                           | M+H                | 3,4-DHPEA-EA (HMDB0029304)                                                   | 0.96    | Food                                                                                                                                                                                                                                            | Phenol lipids                    | 0.0000  | Mann-Whitney U test      | in the WH higher signal intensity |
| 24     | HSST3 (+)       | 381.1181 | 6.71 | 398.1208                         | 1.2          | 398.1213                           | M+H+H2O            | 5-(3',4'-dihydroxyphenyl)-gamma-valerolactone-3'-O-glucuronide (HMDB0029190) | 1.00    | Food                                                                                                                                                                                                                                            | Phenol ethers                    | 0.0000  | Mann-Whitney U test      | in the WH higher signal intensity |
| 25     | HSST3 (-)       | 145.0502 | 5.53 | 164.0686                         | -0.7         | 164.0685                           | M+H2O-H            | L-Fucose (HMDB0000174)                                                       | 0.95    | Food                                                                                                                                                                                                                                            | Organooxygen compounds           | 0.0000  | Mann-Whitney U test      | in the WH higher signal intensity |
| 26     | HSST3 (-)       | 160.0612 | 1.57 | 161.0685                         | 1.9          | 161.0688                           | M-H                | Aminodipic acid (HMDB0000510)                                                | 0.91    | Lysine degradation                                                                                                                                                                                                                              | Carboxylic acids and derivatives | 0.0000  | Student's <i>t</i> -test | in the WH higher signal intensity |
| 27     | HSST3 (-)       | 164.0351 | 3.43 | 165.0424                         | 1.2          | 165.0426                           | M-H                | 6-Methoxy-2(3H)-benzoxazole (HMDB0036582)                                    | 0.75    | Food                                                                                                                                                                                                                                            | Benzoxazoles                     | 0.0000  | Student's <i>t</i> -test | in the WH higher signal intensity |
| 28     | HSST3 (-)       | 227.0669 | 3.64 | 228.0742                         | 1.8          | 228.0746                           | M-H                | Deoxyundine (HMDB00000012)                                                   | 0.89    | Pyrimidine metabolism                                                                                                                                                                                                                           | Pyrimidine nucleosides           | 0.0000  | Mann-Whitney U test      | in the WH higher signal intensity |
| 29     | HSST3 (-)       | 290.1425 | 6.71 | 245.1443                         | 2.7          | 245.1449                           | M+FA-H             | S-3-oxodecanoyl cysteamine (HMDB0059773)                                     | 0.96    | Linoleic acid metabolism                                                                                                                                                                                                                        | Fatty Acyls                      | 0.0000  | Mann-Whitney U test      | in the WH higher signal intensity |
| 30     | HSST3 (-)       | 301.0724 | 6.54 | 256.0742                         | -2.5         | 256.0736                           | M+FA-H             | 2-Dehydro-O-desmethylangolensin (HMDB0041647)                                | 0.92    | Food                                                                                                                                                                                                                                            | Stilbenes                        | 0.0000  | Mann-Whitney U test      | in the WH higher signal intensity |
| 31     | HSST3 (-)       | 127.0514 | 3.50 | 146.0698                         | -4.4         | 146.0691                           | M+H2O-H            | Glutamine (HMDB0000641)                                                      | 0.92    | D-Glutamine and D-glutamate metabolism; Arginine biosynthesis; Alanine, aspartate and glutamate metabolism; Aminoacyl-tRNA biosynthesis; Nitrogen metabolism; Pyrimidine metabolism; Purine metabolism; Glyoxylate and dicarboxylate metabolism | Carboxylic acids and derivatives | 0.0000  | Mann-Whitney U test      | in the WH higher signal intensity |
| 32     | HSST3 (-)       | 157.0867 | 4.90 | 158.0940                         | 1.9          | 158.0943                           | M-H                | trans-4-Hydroxycyclohexylacetic acid (HMDB0000909)                           | 0.84    | Food                                                                                                                                                                                                                                            | Organooxygen compounds           | 0.0000  | Mann-Whitney U test      | in the WH higher signal intensity |
| 33     | HSST3 (-)       | 199.0971 | 5.17 | 218.1155                         | -0.3         | 218.1154                           | M+H2O-H            | 3-hydroxydecanedioic acid (HMDB00340579)                                     | 0.91    | Food                                                                                                                                                                                                                                            | Hydroxy acids and derivatives    | 0.0000  | Mann-Whitney U test      | in the WH higher signal intensity |
| 34     | HSST3 (-)       | 211.0608 | 5.45 | 174.1122                         | -3.0         | 174.1117                           | M+K-2H             | L-Arginine (HMDB0000517)                                                     | 0.89    | Arginine biosynthesis; Arginine and proline metabolism; Aminoacyl-tRNA biosynthesis                                                                                                                                                             | Carboxylic acids and derivatives | 0.0001  | Mann-Whitney U test      | in the WH higher signal intensity |
| 35     | HSST3 (-)       | 306.0628 | 3.67 | 325.0812                         | -4.4         | 325.0798                           | M+H2O-H            | Dihydroxy-1H-indole glucuronide 1 (HMDB0059997)                              | 0.83    | Modified metabolites with glucuronidation                                                                                                                                                                                                       | Organooxygen compounds           | 0.0000  | Mann-Whitney U test      | in the WH higher signal intensity |
| 36     | HSST3 (-)       | 438.2328 | 6.93 | 439.2401                         | -1.9         | 439.2392                           | M-H                | 11-trans-LTE4 (HMDB0062286)                                                  | 0.99    | Arachidonic acid metabolism                                                                                                                                                                                                                     | Fatty Acyls                      | 0.0000  | Mann-Whitney U test      | in the WH higher signal intensity |
| 37     | HSST3 (-)       | 165.0918 | 6.91 | 166.0991                         | 1.7          | 166.0994                           | M-H                | 2,4,7-Decatrienec acid (HMDB0035235)                                         | 0.75    | Food                                                                                                                                                                                                                                            | Fatty Acyls                      | 0.0000  | Mann-Whitney U test      | in the WH higher signal intensity |
| 38     | HSST3 (-)       | 193.1230 | 7.29 | 194.1303                         | 2.0          | 194.1307                           | M-H                | Ethyl (2E,4Z,7Z)-Decatrienoate (HMDB0035376)                                 | 0.92    | Food                                                                                                                                                                                                                                            | Fatty Acyls                      | 0.0000  | Student's <i>t</i> -test | in the WH higher signal intensity |
| 39     | HSST3 (-)       | 213.0764 | 5.17 | 168.0782                         | 2.6          | 168.0786                           | M+FA-H             | (4-Hydroxy-3-methoxyphenyl)ethanol (HMDB0038925)                             | 0.94    | Food                                                                                                                                                                                                                                            | Carboxylic acids and derivatives | 0.0000  | Mann-Whitney U test      | in the WH higher signal intensity |
| 40     | HSST3 (-)       | 259.0755 | 3.50 | 214.0773                         | 1.4          | 214.0776                           | M+FA-H             | Methyl bisnorbiotinyl ketone (HMDB0004822)                                   | 0.98    | Food                                                                                                                                                                                                                                            | Thioimidazolidines               | 0.0000  | Mann-Whitney U test      | in the WH higher signal intensity |
| 41     | HSST3 (-)       | 265.0714 | 5.93 | 284.0898                         | -0.7         | 284.0896                           | M+H2O-H            | p-Cresol glucuronide (HMDB0011686)                                           | 0.84    | Tyrosine metabolism                                                                                                                                                                                                                             | Organooxygen compounds           | 0.0000  | Mann-Whitney U test      | in the WH higher signal intensity |

Abbreviations: m/z—mass-to-charge ratio; t.r.—retention time; WL—the group of women with lower total urinary arsenic; WH—the group of women with higher total urinary arsenic; ‡—delta between calculated molecular weight and monoisotopic molecular weight.
